# Supplementary material
Source: ML conference proceedings conference paper supplement (https://openaccess.thecvf.com/content/WACV2026/html/Bonetto_ZebraPose_Zebra_Detection_WACV_2026_paper.html)
Supplement: Supplementary file 1 [file SuppMat.pdf › SuppMat.pdf]

# ZebraPose: Zebra Detection and Pose Estimation using *only* Synthetic Data

## Supplementary Material

### Overview

This is the supplementary material for ZebraPose. In Table 5, we provide a summary of the training and validation datasets. In there, we include the number of images for the training and validation sets, along with the types of animals contained in each dataset used in this work. Additionally, we present several qualitative results to further illustrate the performance of our models across different datasets and training configurations in Figure 7 for YOLO, and Figures 8 to 13 for ViTPose. All the data (synthetic and real), network weights, results, and code will be open-source.

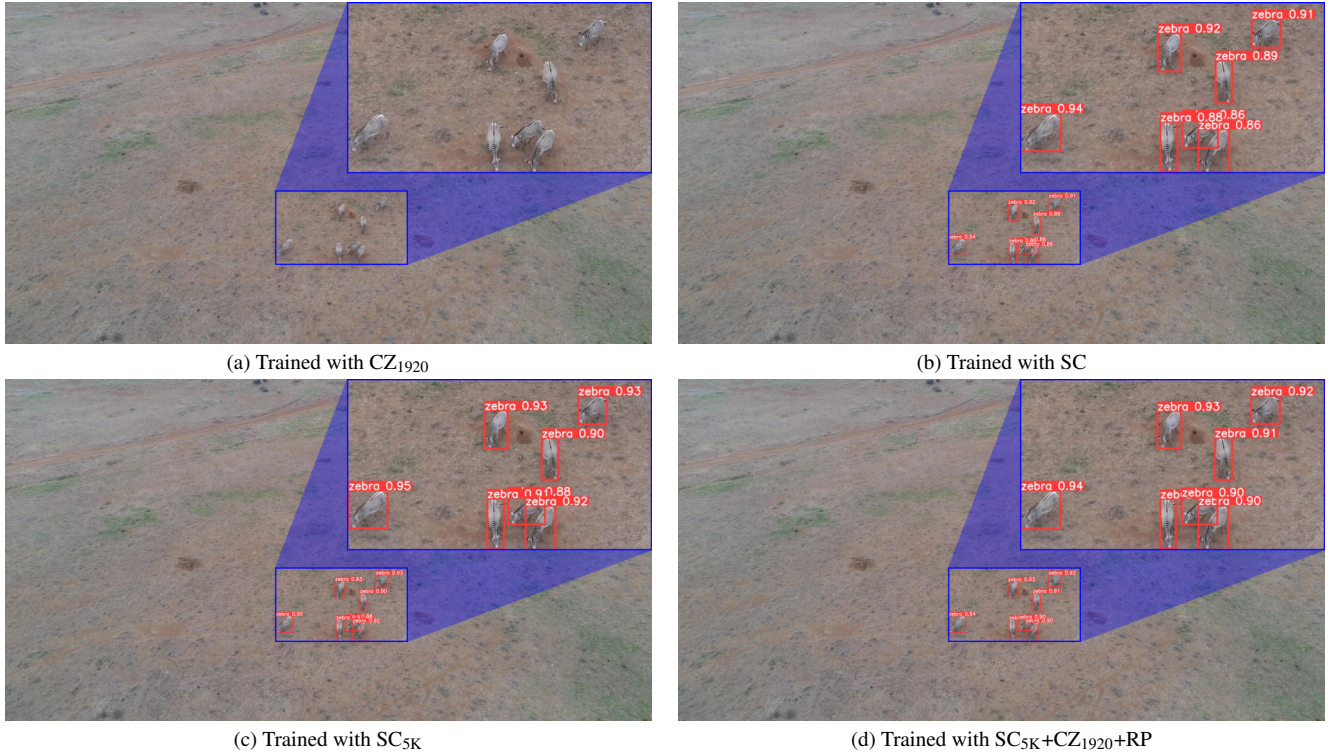

Figure 7. YOLOv5s results on images taken from [31] with images scaled to 1920px.

|        | Synthetic |                         |                 | Real, Common |                           |                   |             |                   |                   |                   |            |                   |                                  | Real, Aerial |        |
|--------|-----------|-------------------------|-----------------|--------------|---------------------------|-------------------|-------------|-------------------|-------------------|-------------------|------------|-------------------|----------------------------------|--------------|--------|
|        | SC<br>[3] | SC <sub>5K</sub><br>New | SpacNet<br>[14] | A10          | A10 <sub>OZ</sub><br>[37] | A10 <sub>99</sub> | A36<br>[36] | A36 <sub>OZ</sub> | Zebra-300<br>[16] | Zebra-Zoo<br>[16] | TDH<br>[8] | TDH <sub>99</sub> | CZ <sub>[1920,640]</sub><br>[22] | R123         | RP     |
| Train  | 14401     | 23184                   | 2640            | 7023         | 140                       | 80                | 28457       | 960               | —                 | —                 | 8380       | 80                | 1916                             | —            | 720    |
| Valid  | 3599      | 5798                    | 360             | 995          | 20                        | 19                | 7026        | 240               | 300               | 100               | 1772       | 19                | 85                               | 104K         | 185    |
| Test   | —         | —                       | —               | 1997         | 40                        | —                 | —           | —                 | —                 | —                 | —          | —                 | —                                | —            | —      |
| Animal | Zebras    | Zebras                  | Zebras          | Various      | Zebras                    | Zebras            | Various     | Zebras            | Zebras            | Zebras            | Horses     | Horses            | Zebras                           | Zebras       | Zebras |

Table 5. Datasets used in this work. We indicate the number of images in each train/validation set and the animal(s) included.

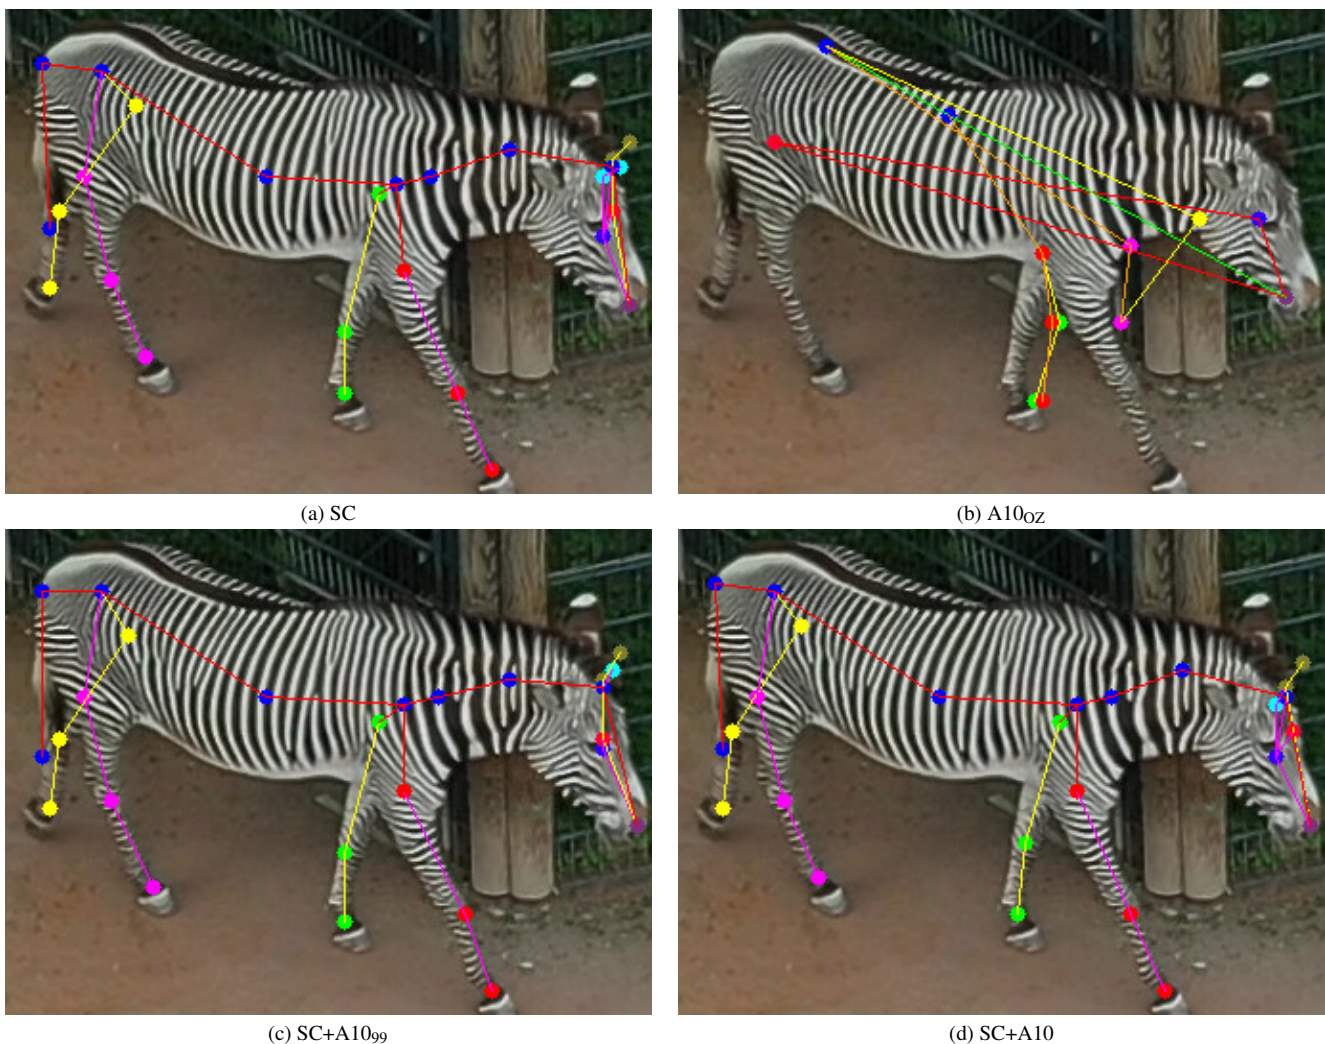

Figure 8. ViTPose+ trained on the specified dataset using a randomly initialized backbone and run on one of the images from the R123 dataset, manually cropped around the zebra *after* inference.

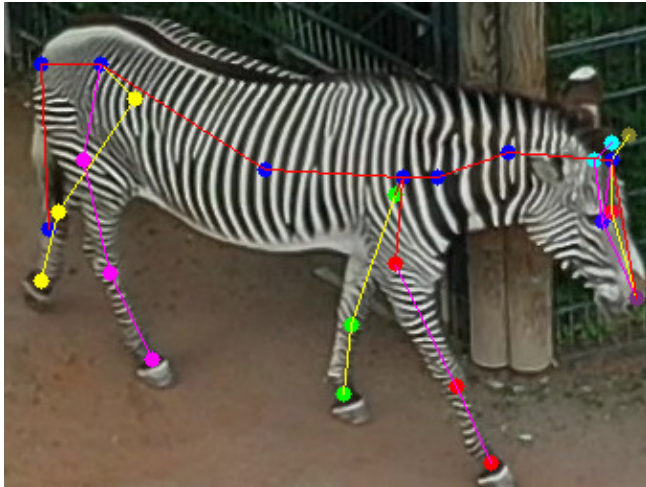

(a) SC

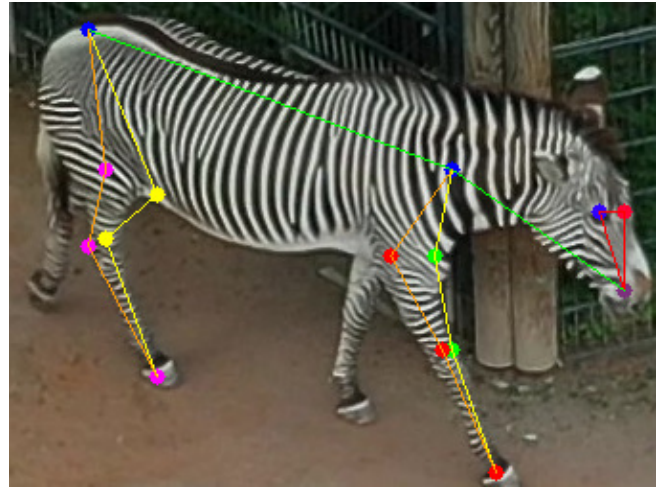

(b) A10oz

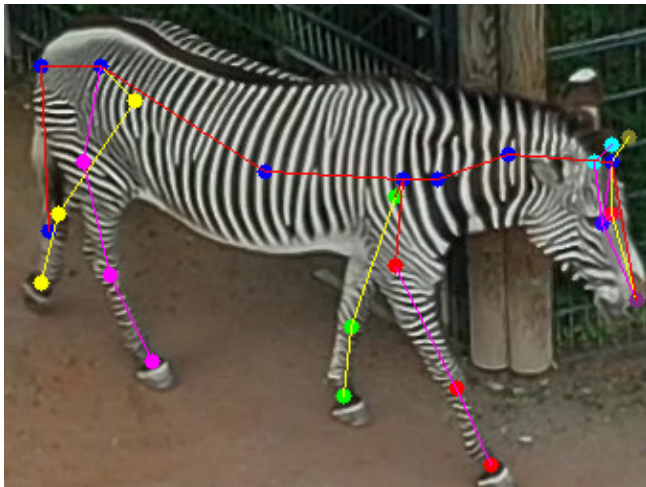

(c) SC+A10<sub>99</sub>

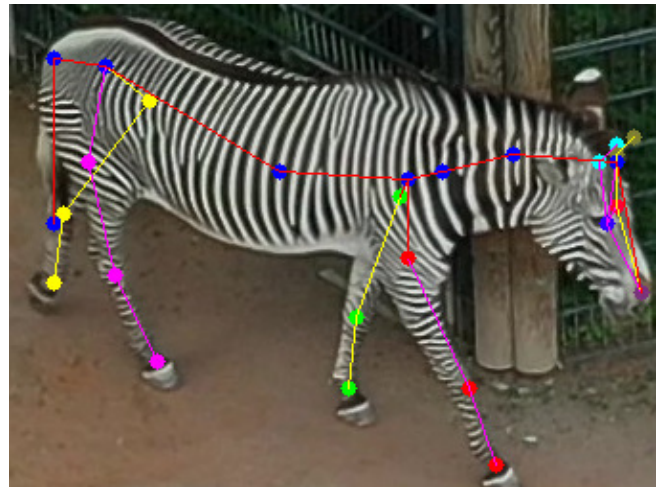

(d) SC+A10

Figure 9. ViTPose+ trained on the specified dataset using a MAE pre-trained backbone and run on one of the images from the R123 dataset, manually cropped around the zebra *after* inference.

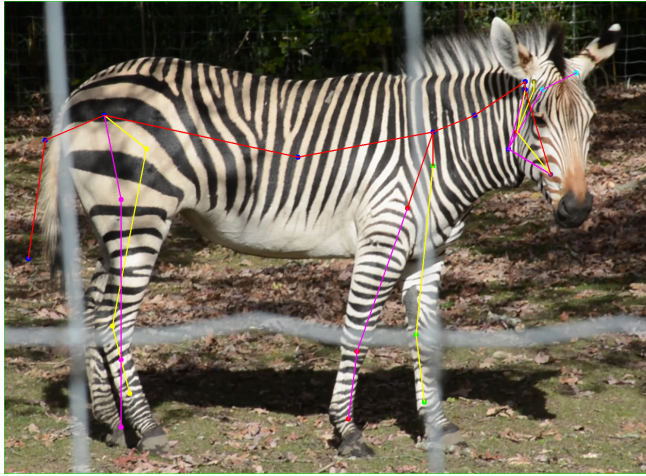

(a) SC

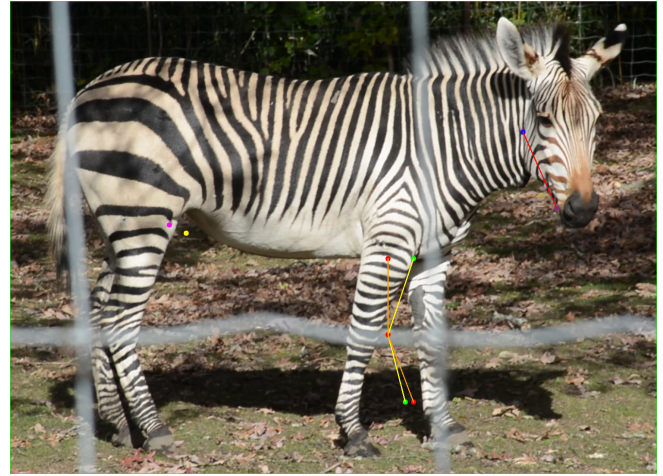

(b) A10oz

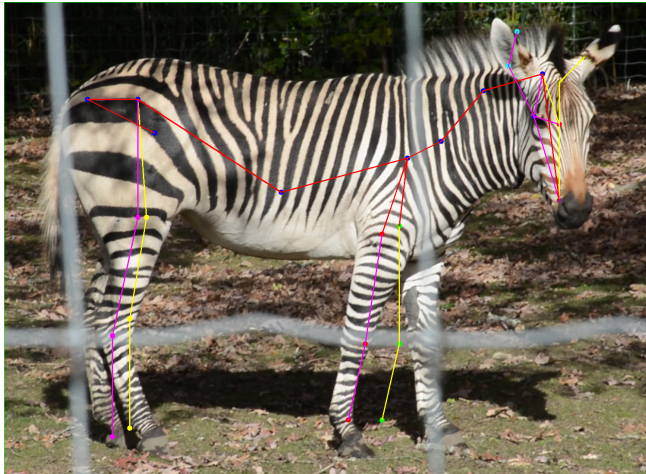

(c) SC+A10<sub>99</sub>

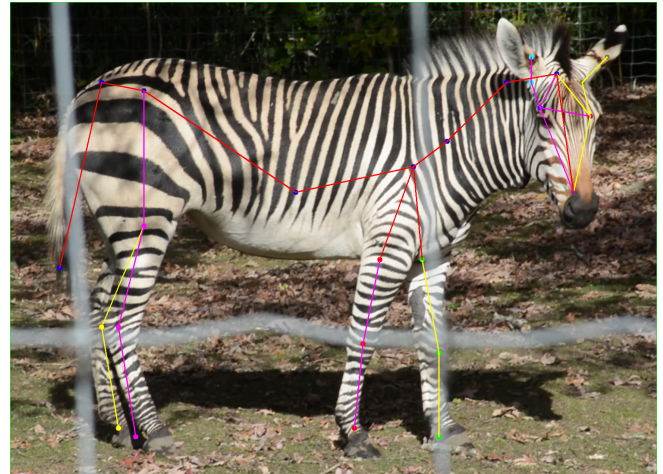

(d) SC+A10

Figure 10. ViTPose+ trained on the specified dataset using a randomly-initialized backbone and run on one of the images from the Zebra-zoo dataset, manually cropped around the zebra *after* inference.

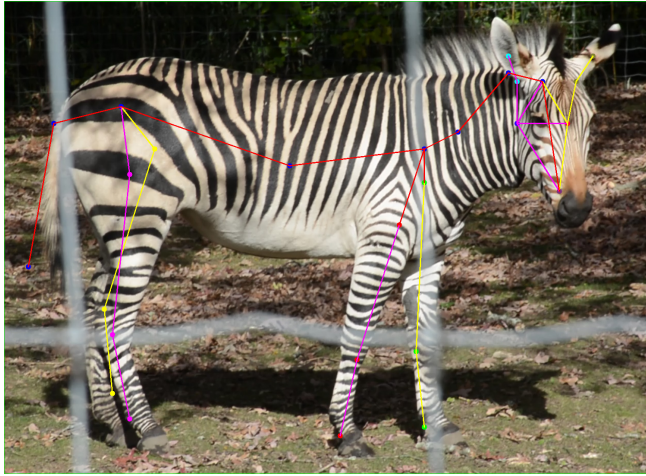

(a) SC

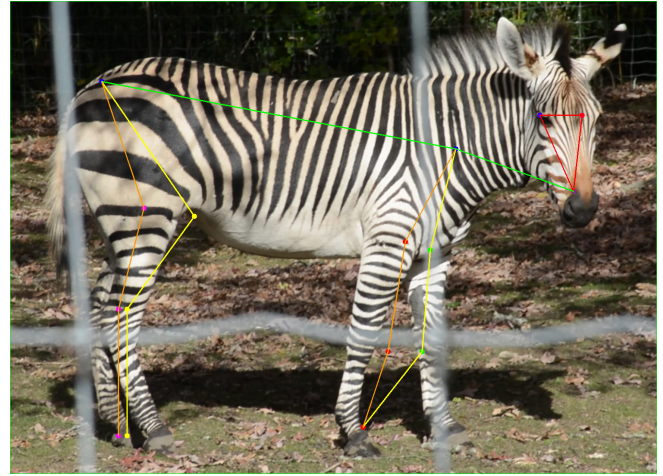

(b) A10oz

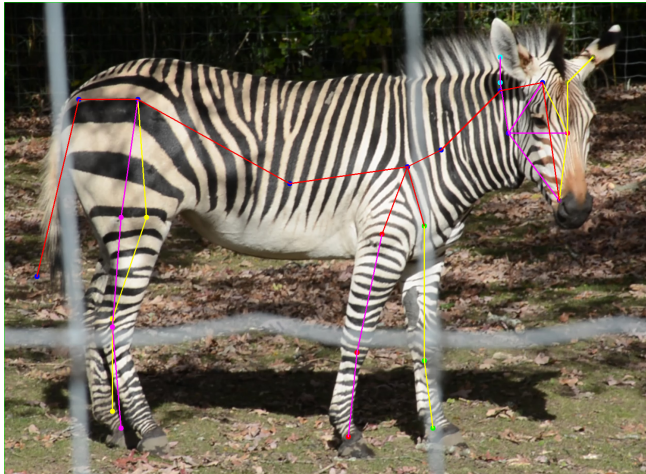

(c) SC+A10<sub>99</sub>

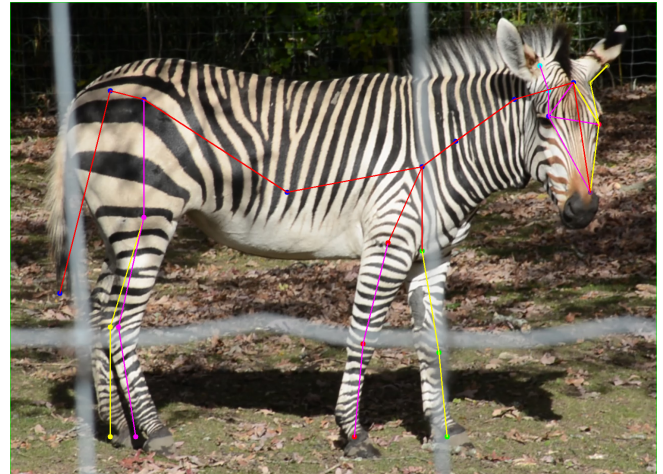

(d) SC+A10

Figure 11. ViTPose+ trained on the specified dataset using a MAE pre-trained backbone and run on one of the images from the Zebra-zoo dataset, manually cropped around the zebra *after* inference.

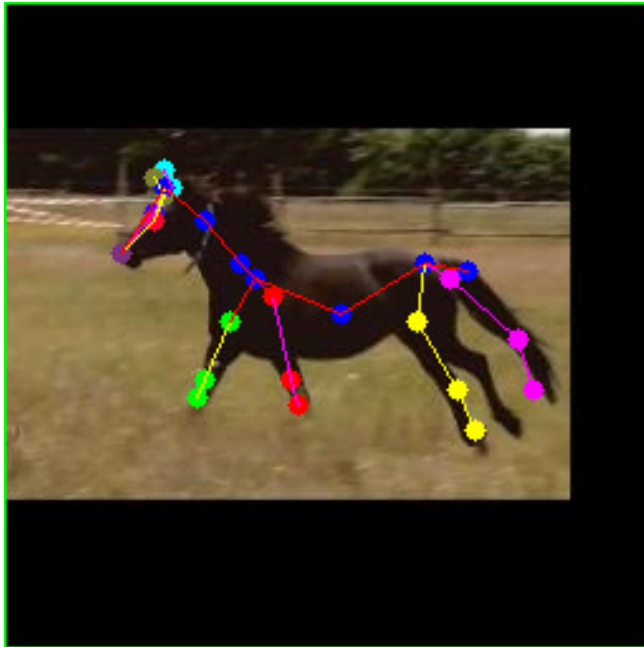

(a) SC

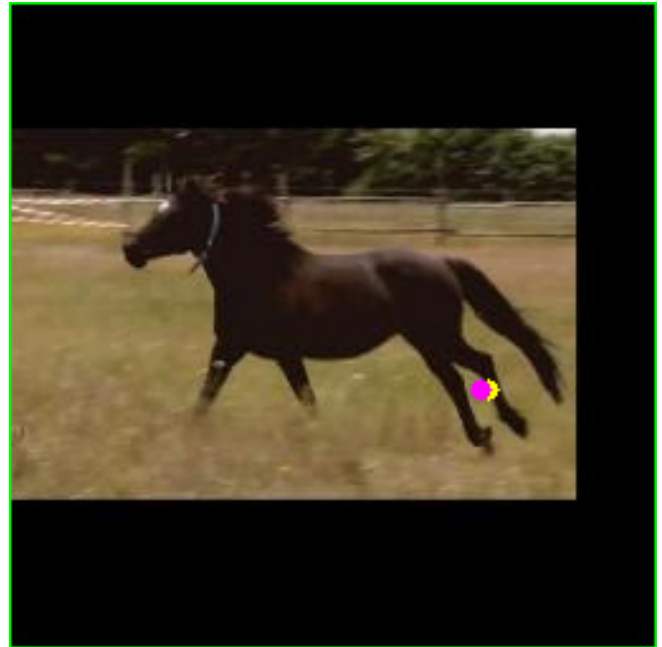

(b) A10oz

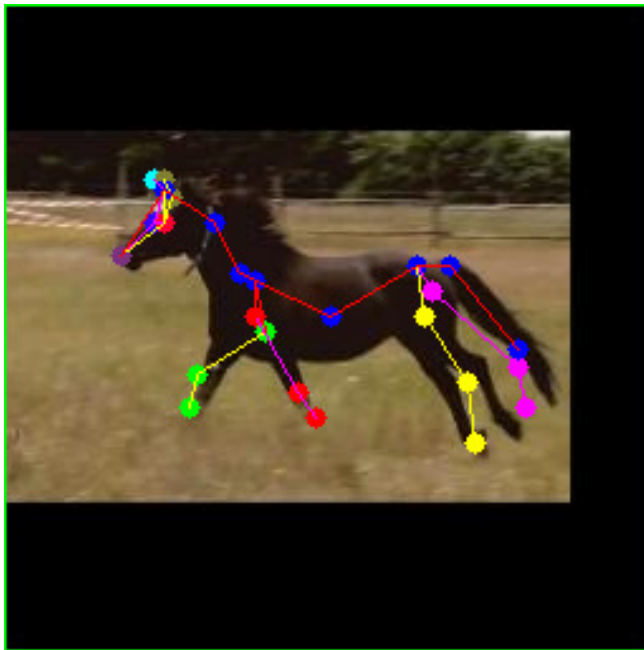

(c) SC+TDH<sub>99</sub>

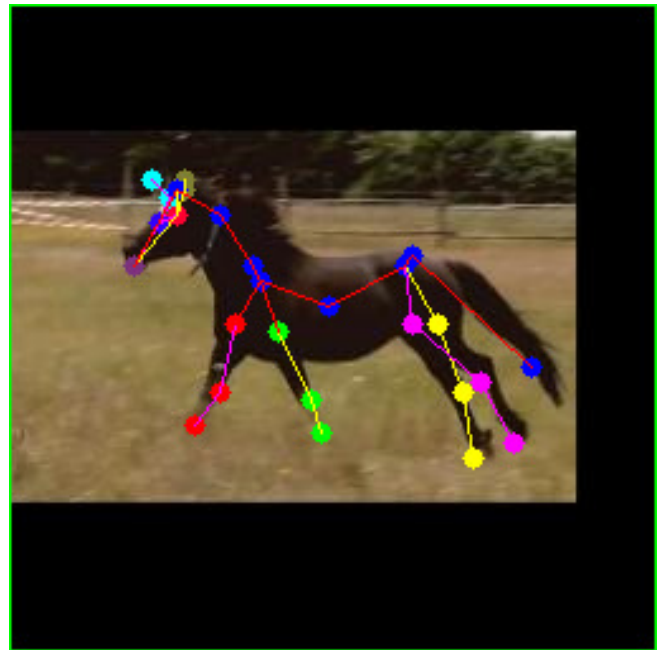

(d) SC+TDH

Figure 12. ViTPose+ trained on the specified dataset using a randomly-initialized backbone and run on one of the images from the TDH dataset shown as *processed* per dataset specifics.

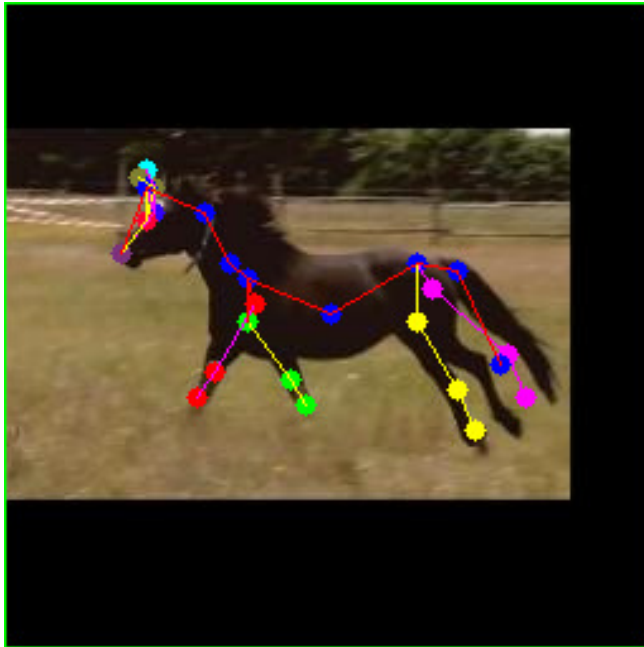

(a) SC

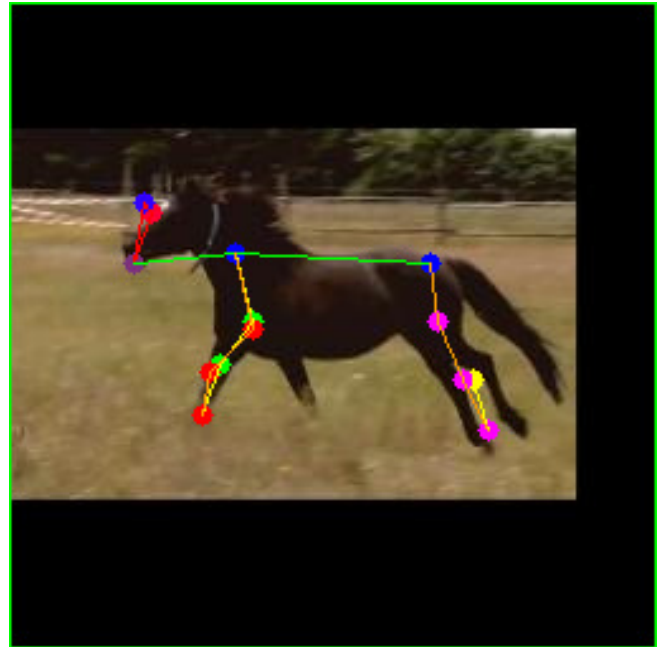

(b) A10oz

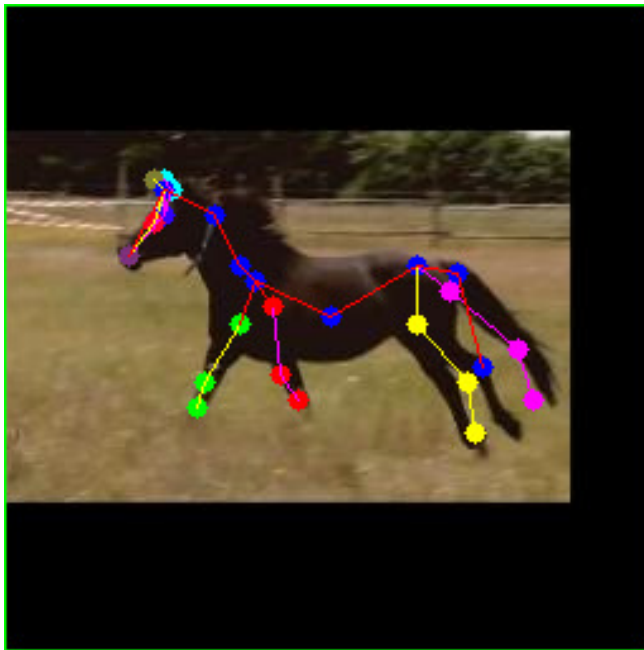

(c) SC+TDH<sub>99</sub>

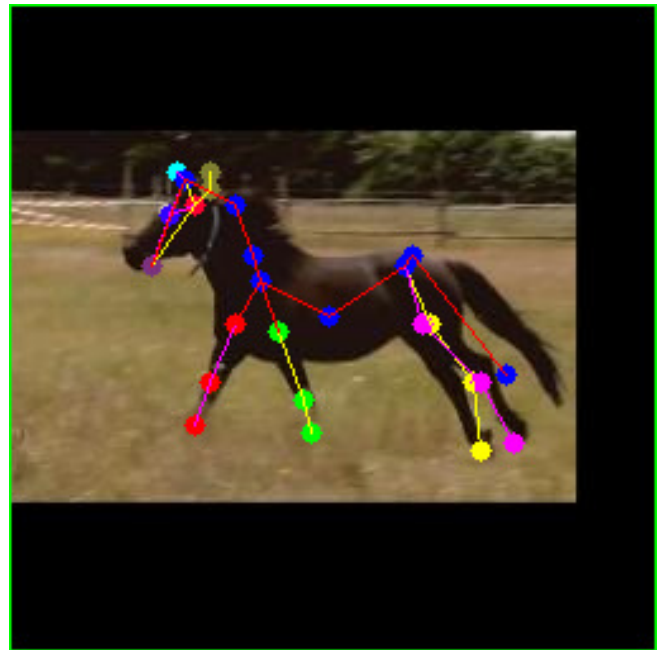

(d) SC+TDH

Figure 13. ViTPose+ trained on the specified dataset using a MAE pre-trained backbone and run on one of the images from the TDH dataset shown as *processed* per dataset specifics.
